# Supplementary material
Source: PubMed Central journal article supplement (PMC2714375)
Supplement: supp_jn.108.096271_nut096271SF01.pdf [file supp_jn.108.096271_nut096271SF01.pdf]

Online Supplemental Material

**Quercetin May Suppress Rat Aberrant Crypt Foci Formation by Suppressing  
Inflammatory Mediators that Influence Proliferation and Apoptosis<sup>1,2,3</sup>**

Cynthia A. Warren<sup>4</sup>, Kimberly J. Paulhill<sup>4</sup>, Laurie A. Davidson<sup>4</sup>, Joanne R. Lupton<sup>4</sup>, Stella S. Taddeo<sup>4</sup>, Meeyoung Hong<sup>4</sup>, Raymond J. Carroll<sup>5</sup>, Robert S. Chapkin<sup>4</sup>, Nancy D. Turner<sup>4\*</sup>

<sup>4</sup>Faculty of Nutrition and <sup>5</sup>Department of Statistics

Texas A&M University, College Station, TX 77843-2253

Online Supporting Material

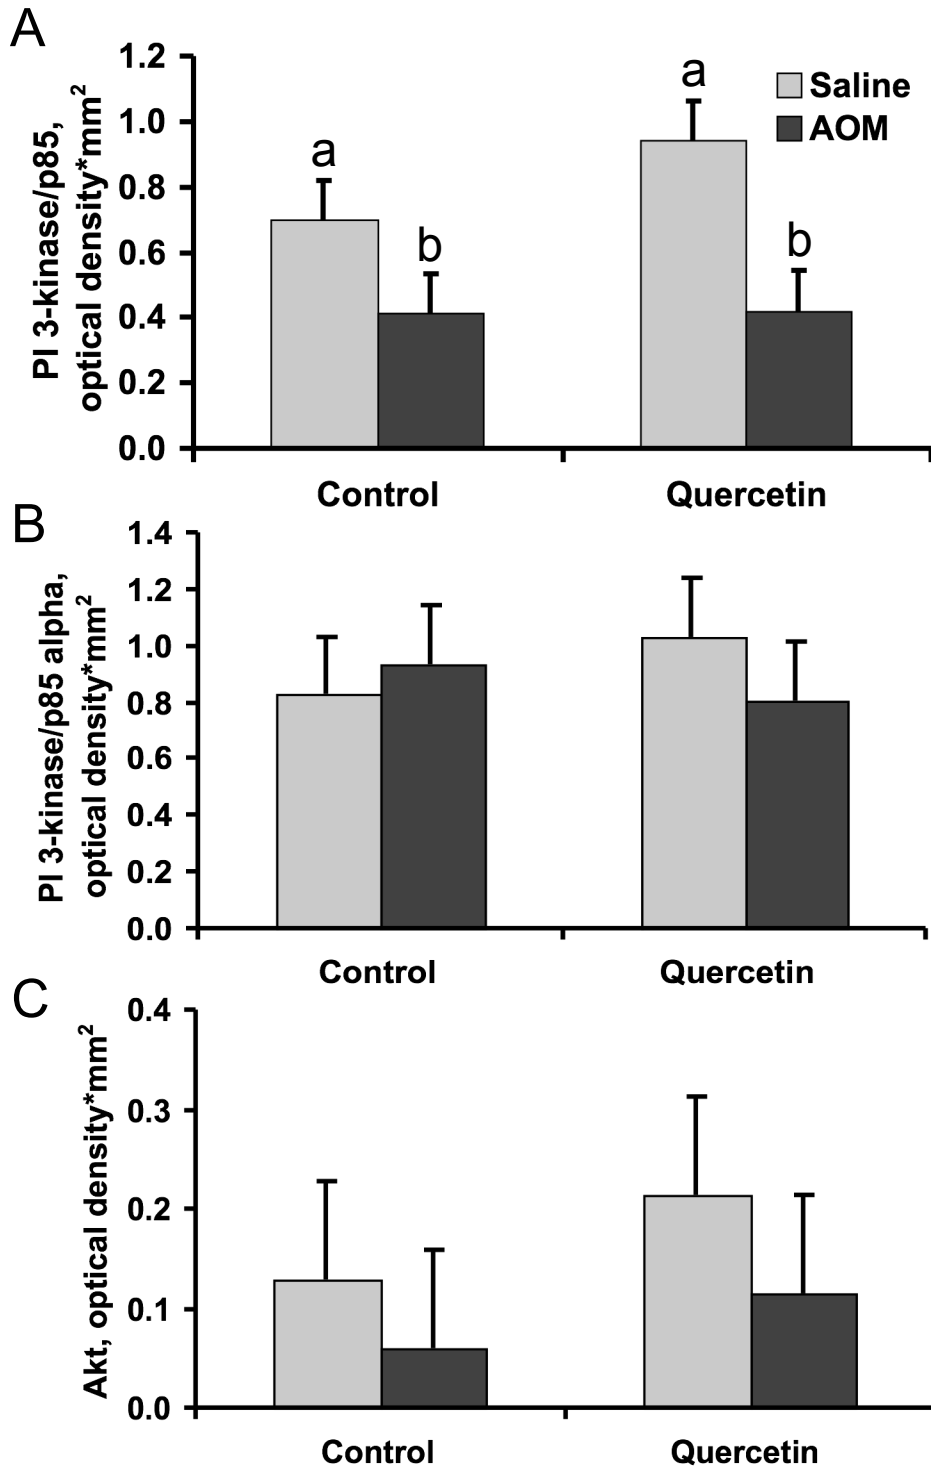

**ONLINE SUPPLEMENTAL FIGURE 1** Levels of the p85 (A) and p85 $\alpha$  (B) subunits of PI 3-kinase, and Akt (C) proteins in scraped colonic mucosa isolated from rats consuming diets containing 0 or 4.5 g/kg quercetin and either injected with saline or the colon-specific carcinogen azoxymethane (AOM). Bars represent least squares means  $\pm$  SEM, n = 10 rats/group. Expression of the p85 subunit of PI 3-kinase was suppressed ( $P < 0.003$ ) by AOM injection. No other differences were detected.
